# Supplementary material for: Flexible to rigid: IR spectroscopic investigation of a rhenium-tricarbonyl-complex at a buried interface
Source: Royal Society of Chemistry journal article supplement (doi:10.1039/d0cp06546c), 2021-01-01
Supplement: d0cp06546c1.pdf [file d0cp06546c1.pdf]

## Supporting Material to: Flexible to Rigid: IR Spectroscopic Investigation of a Rhenium-Tricarbonyl-Complex at a Buried Interface

Kerstin Oppelt\*, Laurent Sevéry, Mirjam Utters, David Tilley, Peter Hamm  
*Department of Chemistry, University of Zurich,  
Winterthurerstr. 190, CH-8057 Zurich, Switzerland  
kerstin.oppelt@uzh.ch*

(Dated: January 26, 2021)

### I. MATERIALS AND METHODS

This study utilizes the fact that the Rhenium tricarbonyl molecule specifically adsorbs to the  $\text{ZrO}_2$  scaffold in a monolayer. Since the  $\text{ZrO}_2$  particle solution we have used has a distribution of particle sizes (Solaronix Z-SP) we calculate the absorbance for 3 cases of particles with 20, 30 and 40 nm in diameter. Previously, the layer thickness could be measured by profilometry [1], however for the thinner layers applied here, we decided to utilize scanning electron microscopy to see the films. The sensitized sample without ALD deposited  $\text{ZrO}_2$  was measured to estimate the coverage with rhenium carbonyl molecules.

### II. SCANNING ELECTRON MICROSCOPY

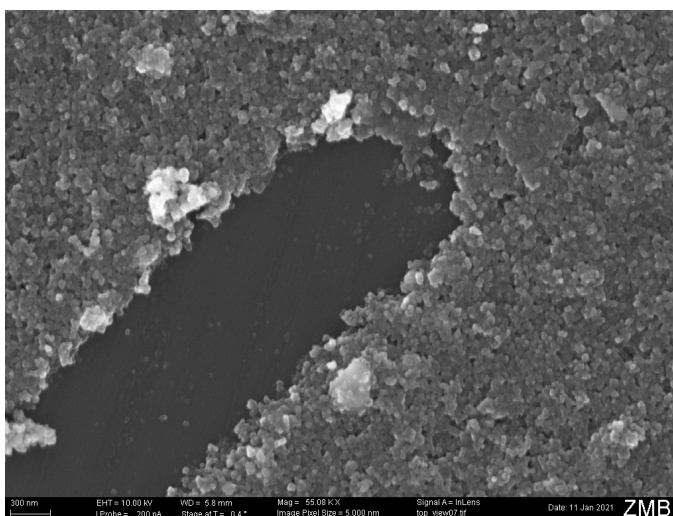

FIG. 1. SEM of sample without ALD layer, top view with scratch to show layer thickness.

Imaging was performed with a field emission scanning electron microscope (Zeiss Supra 50 VP or Zeiss Gemini 450) equipped with an in-lens secondary electron detector. The samples were prepared by thermal evaporation of 5–7 nm of carbon using a high-vacuum sputter coating device (Safematic CCU-010 HV) with an CT-010 Carbon Thread Head.

SEM images were taken after all measurements were completed (the sample had to be broken into pieces) with a top view (Fig. 1) after scratching the surface to show the underlying  $\text{CaF}_2$  window. It can be seen there that the size of the particles roughly varies between 20–40 nm, some of them larger. A cross section of the sample is shown in Fig. 2. The mesoporous  $\text{ZrO}_2$  film is between 130 and 310 nm thick, the average is  $215 \pm 13$  nm ( $P=95\%$ ). This value was obtained by digitization of the image in Fig. 2 with OriginPro 2020.

### III. SURFACE COVERAGE ESTIMATION

From weight and height measurements of thicker films (1.8  $\mu\text{m}$ ) combined with their geometric area we found the porosity of the deposited  $\text{ZrO}_2$  layers to be around 51%. As such the measured density was about  $2.8 \text{ g cm}^{-3}$  compared

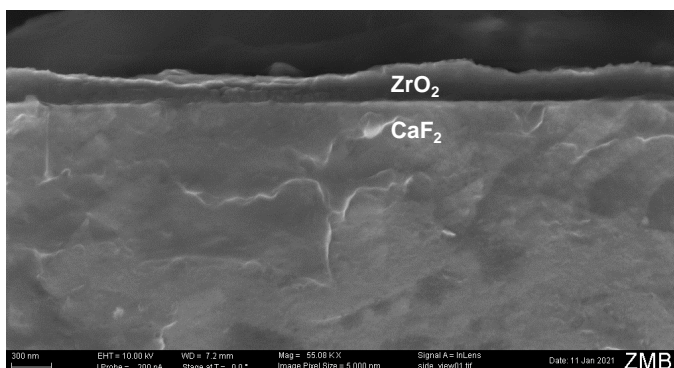

FIG. 2. SEM of sample without ALD layer, cross section.

to the theoretical value for solid  $\text{ZrO}_2$  with  $5.68 \text{ g cm}^{-3}$ . We used the obtained porosity value also for the thinner films and estimated the amount of particles with 20, 30 and 40 nm diameter per area of a 215 nm thick film. From that, the total surface area can be calculated, assuming perfect spheres. The footprint of the molecule is about  $1 \text{ nm}^2$  [2] and the absorbance coefficient of the  $a'(1)$  mode (in solution) is  $2650 \text{ cm}^{-1} \text{ M}^{-1}$ . [1]. Using these values the expected absorbance of the  $a'(1)$  mode on the samples are 14, 9 and 7 mOD, depending on the assumed particle diameter. The particles are 20-40 nm in size, the majority of them are larger than 30 nm (see Fig.1). The measured absorbance is well within that range for uncovered  $\text{ZrO}_2$ , it gets lower and the signal gets much broader when the molecule is covered with ALD layers. With the measured absorbance of 6-8 mOD, there is on average one monolayer of Re molecules on the surface.

- 
- [1] K. Oppelt, R. Fernández-Terán, R. Pfister, and P. Hamm, Geminate Recombination versus Cage Escape in the Reductive Quen-ching of a Re(I) Carbonyl Complex on Mesoporous  $\text{ZrO}_2$ , *The Journal of Physical Chemistry C* **123**, 19952 (2019).  
 [2] K. Oppelt, M. Mosberger, J. Ruf, R. Fernández-Terán, B. Probst, R. Alberto, and P. Hamm, Shedding Light on the Molecular Surface Assembly at the Nanoscale Level: Dynamics of a Re(I) Carbonyl Photosensitizer with a Coadsorbed Cobalt Tetrapyrrolyl Water Reduction Catalyst on  $\text{ZrO}_2$ , *The Journal of Physical Chemistry C* **124**, 12502 (2020).
